# Supplementary material
Source: publisher site journal article supplement (https://www.dovepress.com/article/140221)
Supplement: Supplementary file 1 [file get_supplementary_file.php]

## Supplementary material

**Supplementary Table S1. Grouping information for the combination among the *ADH1A*, *ADH5* and *ADH6* genes**

| <b>Groups</b>                 | <b>Combination</b>                                                                                                                                                       |
|-------------------------------|--------------------------------------------------------------------------------------------------------------------------------------------------------------------------|
| <b><i>ADH1A+ADH5</i></b>      |                                                                                                                                                                          |
| <b>Group 1</b>                | low <i>ADH1A</i> +high <i>ADH5</i>                                                                                                                                       |
| <b>Group 2</b>                | low <i>ADH1A</i> +low <i>ADH5</i> or high <i>ADH1A</i> +high <i>ADH5</i>                                                                                                 |
| <b>Group 3</b>                | high <i>ADH1A</i> +low <i>ADH5</i>                                                                                                                                       |
| <b><i>ADH1A+ADH6</i></b>      |                                                                                                                                                                          |
| <b>Group i</b>                | low <i>ADH1A</i> +low <i>ADH6</i>                                                                                                                                        |
| <b>Group ii</b>               | low <i>ADH1A</i> +high <i>ADH6</i> or high <i>ADH1A</i> +low <i>ADH6</i>                                                                                                 |
| <b>Group iii</b>              | high <i>ADH1A</i> +high <i>ADH6</i>                                                                                                                                      |
| <b><i>ADH5+ADH6</i></b>       |                                                                                                                                                                          |
| <b>Group A</b>                | high <i>ADH5</i> +low <i>ADH6</i>                                                                                                                                        |
| <b>Group B</b>                | low <i>ADH5</i> +low <i>ADH6</i> or high <i>ADH5</i> +high <i>ADH6</i>                                                                                                   |
| <b>Group C</b>                | low <i>ADH5</i> +high <i>ADH6</i>                                                                                                                                        |
| <b><i>ADH1A+ADH5+ADH6</i></b> |                                                                                                                                                                          |
| <b>Group I</b>                | low <i>ADH1A</i> +high <i>ADH5</i> +low <i>ADH6</i>                                                                                                                      |
| <b>Group II</b>               | low <i>ADH1A</i> +high <i>ADH5</i> + high <i>ADH6</i> or low <i>ADH1A</i> +low <i>ADH5</i> + low <i>ADH6</i> or high <i>ADH1A</i> +high <i>ADH5</i> + low <i>ADH6</i>    |
| <b>Group III</b>              | low <i>ADH1A</i> +low <i>ADH5</i> + high <i>ADH6</i> or high <i>ADH1A</i> + high <i>ADH5</i> + high <i>ADH6</i> or high <i>ADH1A</i> + low <i>ADH5</i> + low <i>ADH6</i> |
| <b>Group IV</b>               | high <i>ADH1A</i> +low <i>ADH5</i> + high <i>ADH6</i>                                                                                                                    |
